# Supplementary material for: Tunable growth of PbS quantum dot–ZnO heterostructure and mechanism analysis
Source: Royal Society of Chemistry journal article supplement (doi:10.1039/c5ce00292c), 2015-01-01
Supplement: c5ce00292c1.pdf [file c5ce00292c1.pdf]

# CrystEngComm

## Supporting Information for

### Tunable Growth of PbS Quantum Dots-ZnO Heterostructure and

### Mechanism Analysis

Haili Li,<sup>a</sup> Shujie Jiao,<sup>\*a, b</sup> Hongtao Li,<sup>a</sup> Lin Li<sup>b</sup> and Xitian Zhang<sup>b</sup>

Supporting information S1:

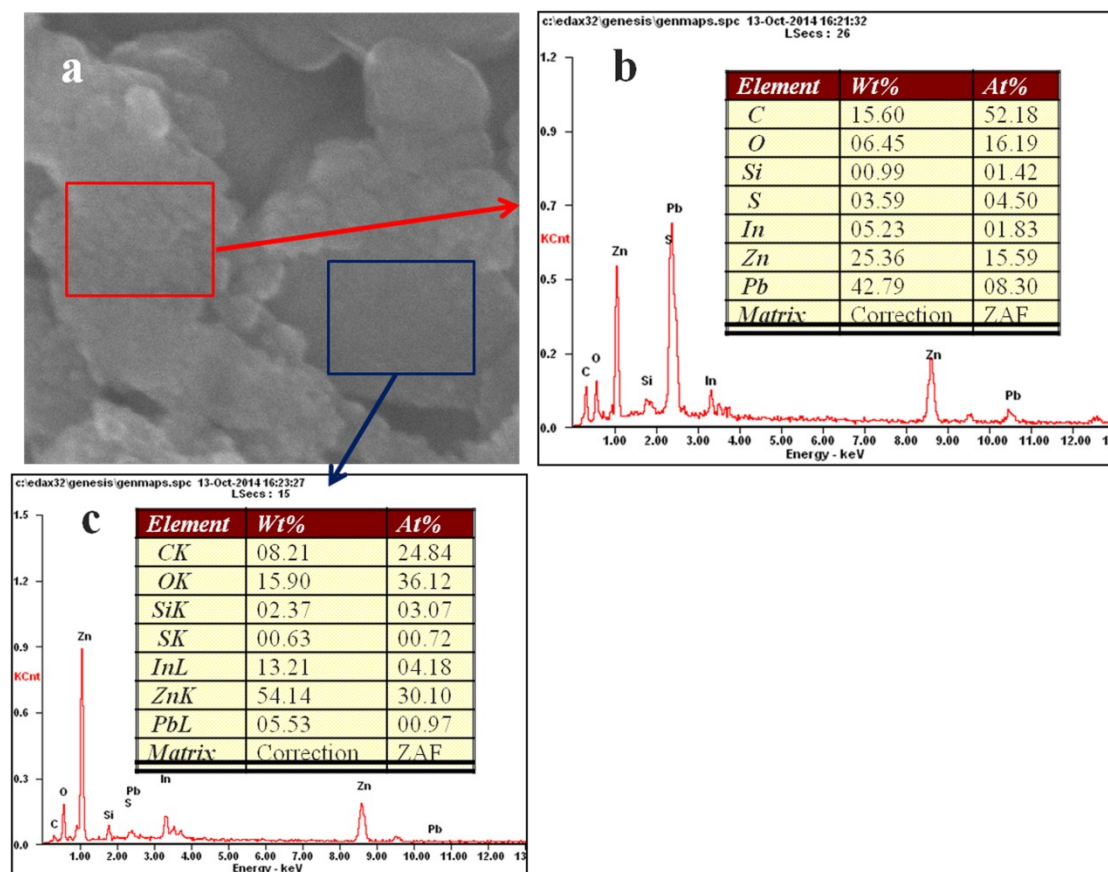

Figure S1. EDS of PbS QDs-ZnO heterostructure formed by using pure WATER as solvent of  $\text{Pb}(\text{NO}_3)_2$ .

Supporting information S2:

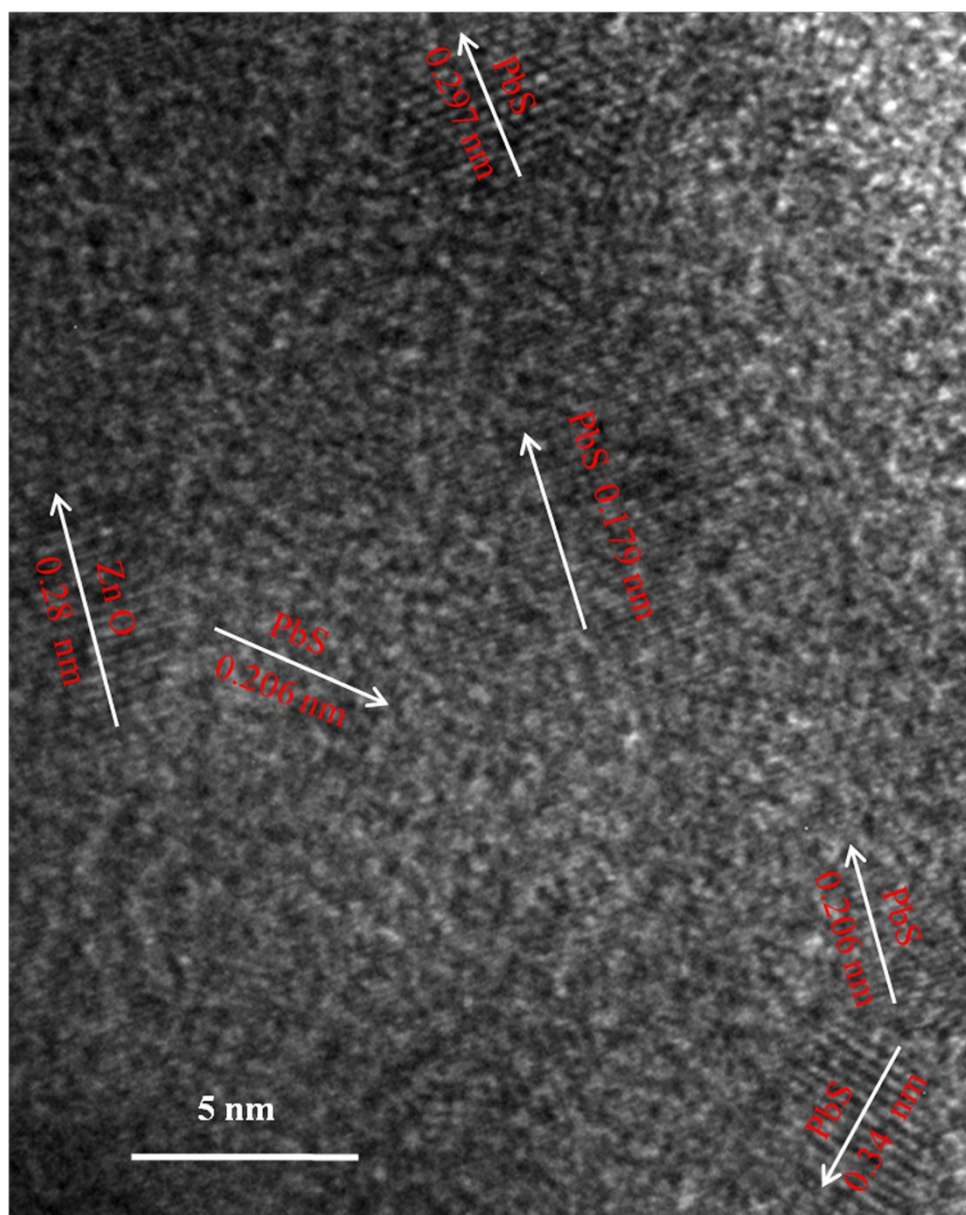

Figure S2. HRTEM image of PbS QDs-ZnO heterostructure formed in  $\text{Pb}(\text{NO}_3)_2$  solution with volume ratio of ethanol/water 2:1.

Supporting information S3:

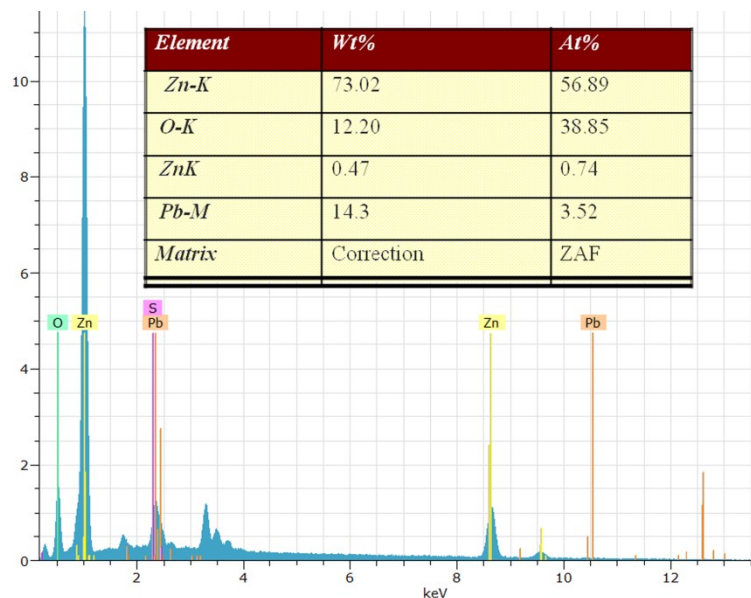

Figure S3. EDS of PbS QDs-ZnO heterostructure formed by using ethanol/water mixture (v/v=2:1) as solvents of  $\text{Pb}(\text{NO}_3)_2$  solutions. The concentration of  $\text{Pb}(\text{NO}_3)_2$  is 0.03 M corresponding to sample in Figure 5c.

Supporting information S4:

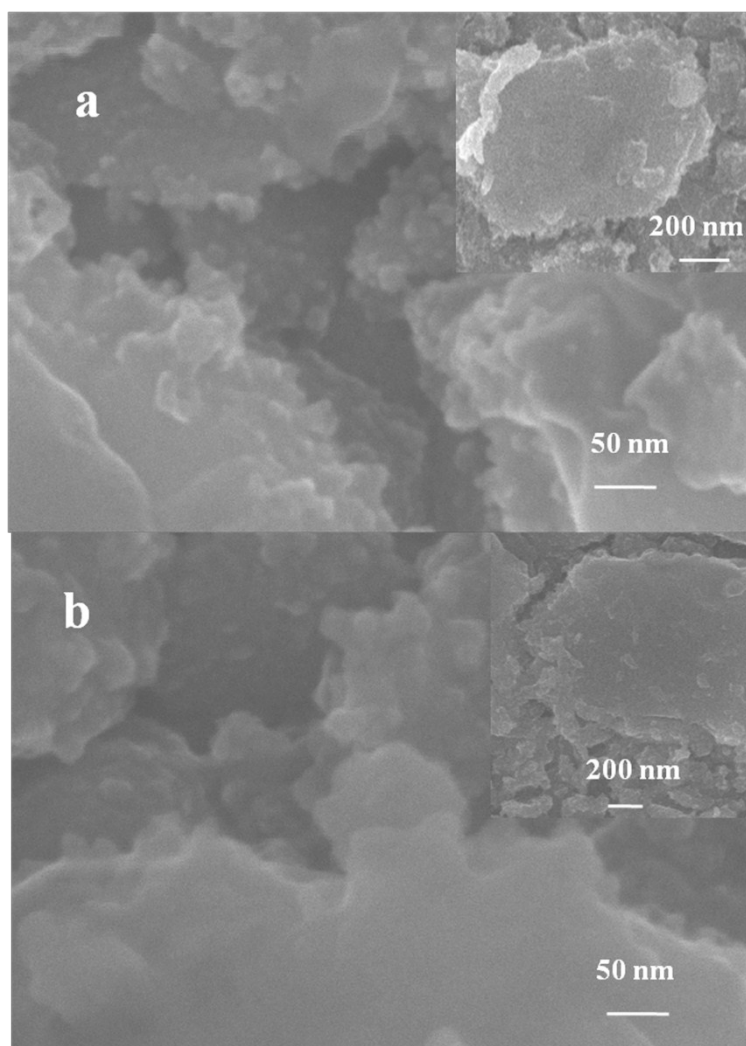

Figure S4. SEM images of PbS QDs-ZnO heterostructures formed by SILAR method with different dipping times in  $\text{Pb}(\text{NO}_3)_2$  solution each circle: (a) 3 times; (b) 5 times.
